# Supplementary material for: Temperature-controlled hydrothermal synthesis of a 2D ferromagnetic coordination bilayered polymer and a novel 3D network with inorganic Co3(OH)2ferrimagnetic chains
Source: Royal Society of Chemistry journal article supplement (doi:10.1039/b312058a), 2004-01-01
Supplement: b312058a.doc [file b312058a.doc]

**Fig. S1** One layer of the structure of **1** in the *ab*-plane

**Fig. S2** Top- and side-views of the bilayered structure of **1**.

**Fig. S3** Three-dimensional hydrogen bond network of **1**.

**Fig. S4** Plot of **eff versus *T* for **2**. Insert: The **-1(*T*) curve.

# Fig. S5 (a) Hysteresis loop ( 10 kOe) and (b) M-H curve of 2 up to 50 kOe.

**Figure S6** Simulated (red line) and experimental (blue line) XRPD data of **1**

**Figure S7** Simulated (red line) and experimental (dark blue line) XRPD data of **2**
